# Supplementary material
Source: Springer Nature journal article supplement (https://www.springermedizin.de/resource/supplementary/13019_2009_235_MOESM2_ESM.pdf/9638234)

21.7

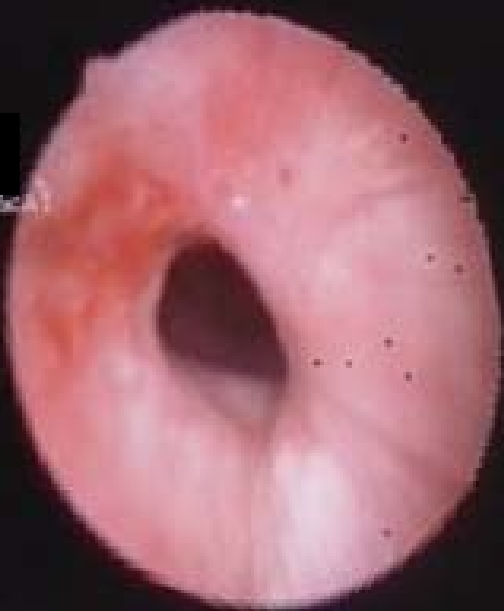

0:00

bcA1

Physician  
Comment:

21.7

22/09/2008  
13:17:15

0:00

bcA1

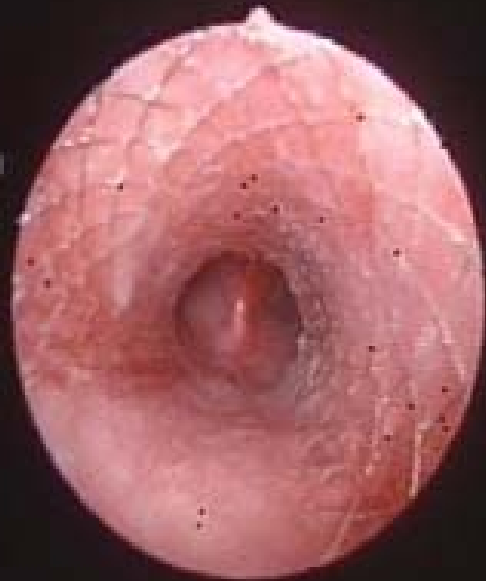

Physician  
Comment:

Supplement: MOESM2 [file 9638234]
